# Supplementary material for: Novel Computed Tomography Variables for Assessing Tricuspid Valve Morphology: Results from the TRIMA (Tricuspid Regurgitation IMAging) Study
Source: MDPI journal article supplement (doi:10.3390/jcm11102825), 2022-05-17
Supplement: s1 [file s1]

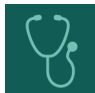

## Supplementary Material

|                                                                                                           |                                                                                      |  |
|-----------------------------------------------------------------------------------------------------------|--------------------------------------------------------------------------------------|--|
| Automated TV annulus area and perimeter<br>Manual commissure identification<br>(Tricuspid valve workflow) | 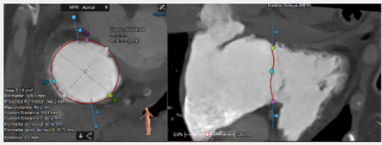   |  |
| Septal-lateral and the antero-posterior annular dimensions<br>(Tricuspid valve workflow)                  |    |  |
| Distance between commissures<br>(Tricuspid valve workflow)                                                |    |  |
| Identification of the geometrical centroid<br>(Tricuspid valve workflow)                                  |    |  |
| Distance between the centroid and commissures<br>(Tricuspid valve workflow)                               |   |  |
| Angles formed by the centroid and two contiguous commissures<br>(Tricuspid valve workflow)                |  |  |
| Tenting height in 4ch and 2ch<br>(MPR)                                                                    |  |  |
| Leaflets tethering degree<br>(MPR)                                                                        |  |  |
| AROA<br>(MPR)                                                                                             |  |  |
| RA and RV height in 4ch<br>(MPR)                                                                          |  |  |
| RA and RV height in 2ch<br>(MPR)                                                                          |  |  |

**Figure S1.** Step-by-step analysis using the 3mensio Structural Heart software (Pie Medical Imaging, Maastricht, The Netherlands). MPR: multiplanar reconstruction; AROA: anatomical regurgitant orifice area; RA: right atrium; RV: right ventricle; 4ch: four-chamber; 2ch: two-chamber.
